# Supplementary material for: Au/graphene oxide/carbon nanotube flexible catalyst film: synthesis, characterization and its application for catalytic reduction of 4-nitrophenol
Source: Royal Society of Chemistry journal article supplement (doi:10.1039/c5ra05214a), 2015-01-01
Supplement: c5ra05214a1.pdf [file c5ra05214a1.pdf]

## **Au/graphene oxide/carbon nanotube flexible catalyst film: synthesis, characterization and its application for catalytic reduction of 4-nitrophenol**

Fan Yang,<sup>a</sup> Chunxia Wang,<sup>b</sup> Lina Wang,<sup>a</sup> Chao Liu,<sup>a</sup> Andong Feng,<sup>a</sup> Xue Liu,<sup>a</sup>  
Cheng Chi,<sup>a</sup> Xilai Jia,<sup>a</sup> Liqiang Zhang,<sup>a</sup> Yongfeng Li<sup>a\*</sup>

<sup>a</sup>State Key Laboratory of Heavy Oil Processing, China University of Petroleum, Beijing, Changping 102249, China. Phone/Fax: +86-010-89739028. E-mail: yfli@cup.edu.cn.

<sup>b</sup>Beijing National Laboratory for Molecular Sciences, Key Laboratory of Analytical Chemistry for Living Biosystems, Institute of Chemistry, the Chinese Academy of Sciences, Beijing 100190, China.

### **1. Materials**

All chemicals were used as received without further purification: graphite powder (200 mesh) (Alfa Aesar, Johnson Matthey Company); H<sub>2</sub>AuCl<sub>4</sub>·4H<sub>2</sub>O (Sinopharm Chemical Reagent Beijing Co., Ltd); 1-methyl-2-pyrrolidone (C<sub>5</sub>H<sub>9</sub>NO) (Aladdin Industrial Corporation); KMnO<sub>4</sub>, H<sub>2</sub>O<sub>2</sub>, Ethanol, methylene chloride (CH<sub>2</sub>Cl<sub>2</sub>), Acetone, acetic ether, tetrahydrofuran, toluene, N,N-Dimethylformamide (DMF) (Beijing chemical works).

2. The TEM images of G/C-Au-1, G/C-Au-3, G-Au, C-Au

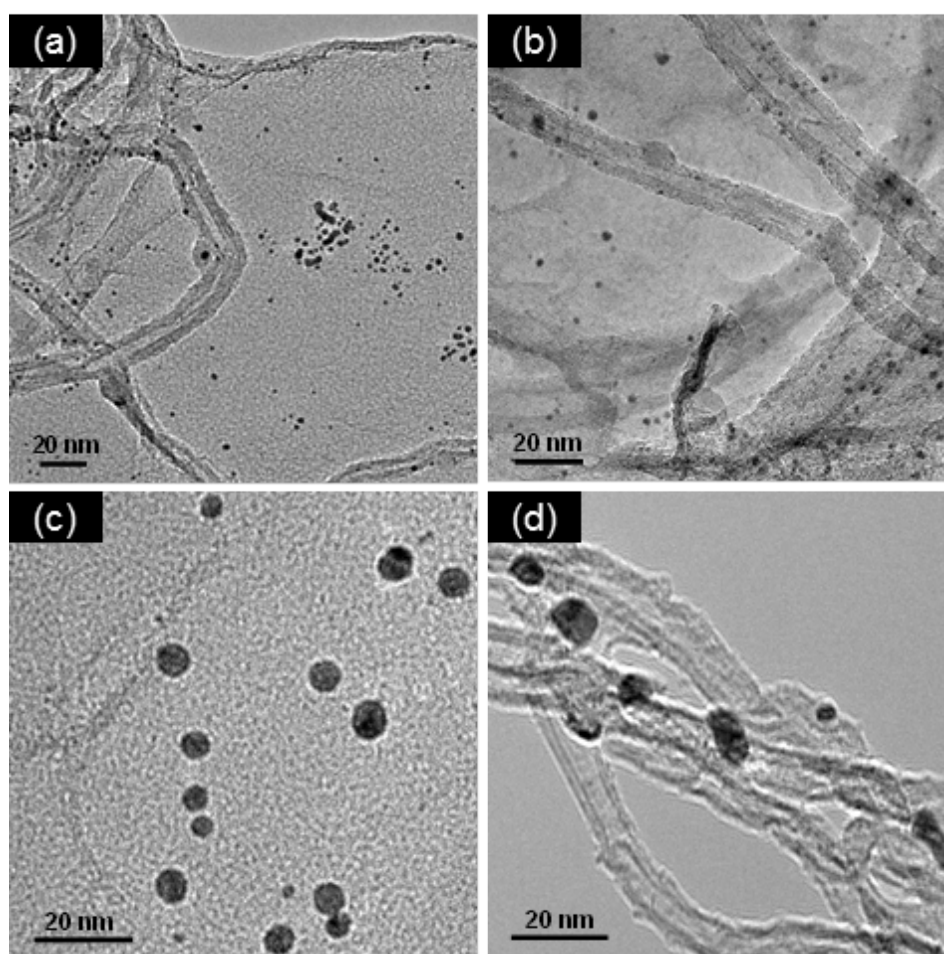

Figure S1. TEM images of G/C-Au-1 (a), G/C-Au-3 (b), G-Au (c), C-Au (d).

### 3. The size distribution of Au nanoparticles decorated on the surface of carbon materials.

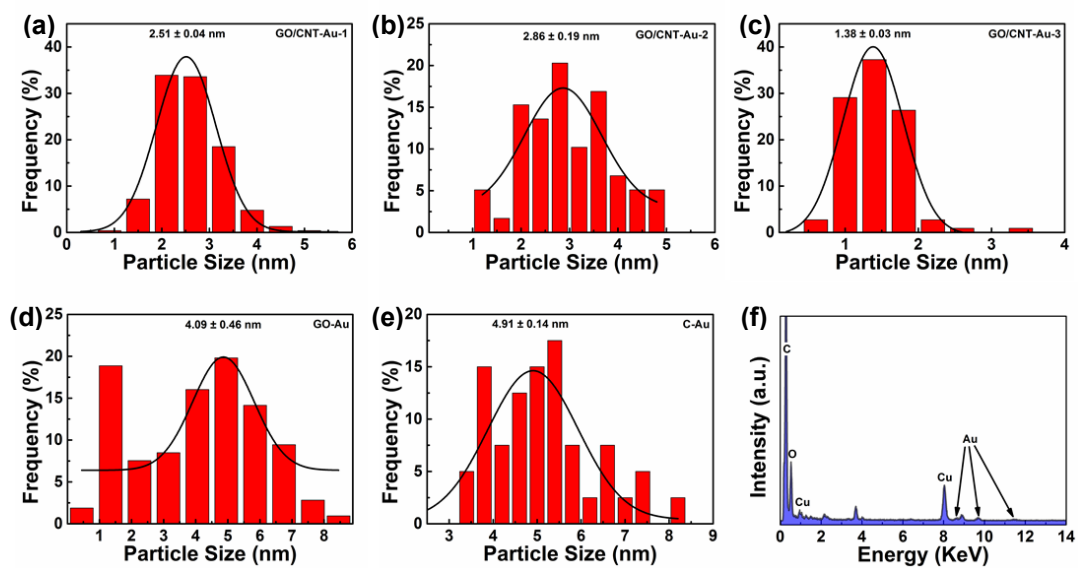

Figure S2. Particle size distributions of G/C-Au-1 (a), G/C-Au-2 (b), G/C-Au-3 (c), G-Au (d), C-Au (e) from the TEM images in Fig. S1, and EDX pattern of G/C-Au-2 (f).

#### 4. Images of before and after the Au catalyst 4-NP reduction reaction

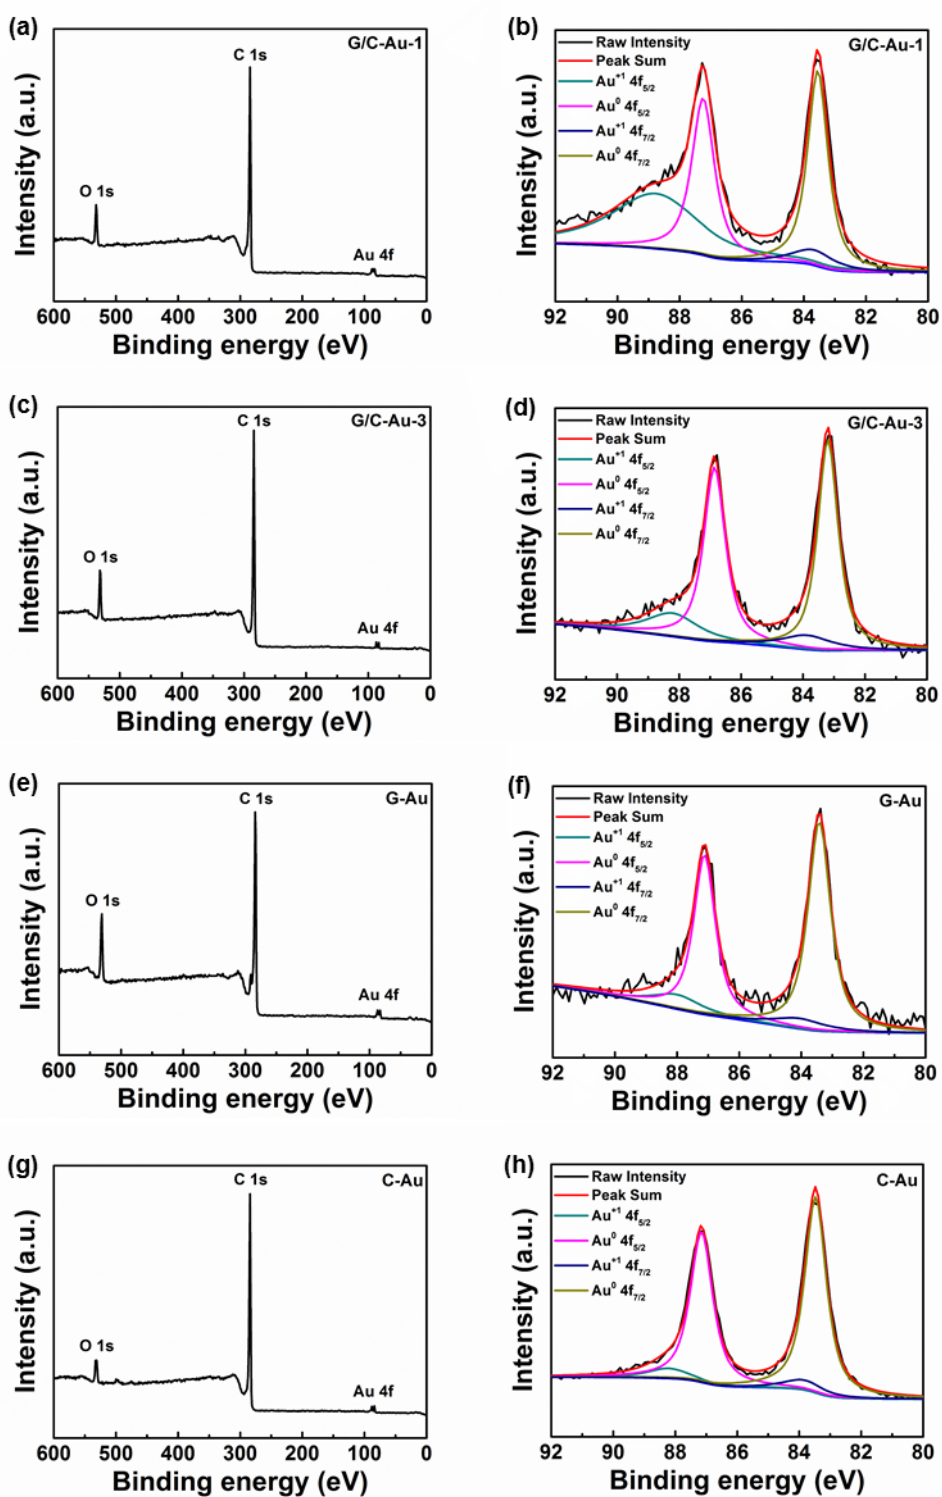

Figure S3. XPS spectra of G/C-Au-1 (a), G/C-Au-3 (c), G-Au (e), C-Au (g); high-resolution XPS spectra of Au 4f of G/C-Au-1 (b), G/C-Au-3 (d), G-Au (f), C-Au (h).

#### 4. Images of before and after the Au catalyst 4-NP reduction reaction

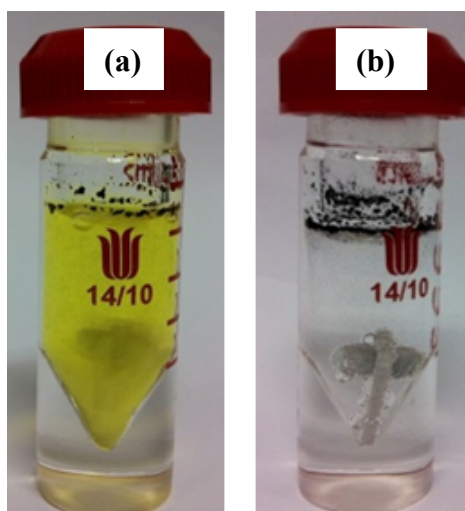

Figure S4. Images of the Au catalysts catalyze the 4-NP reduction in water before (a) and after (b) the reactions.

**5. Images of before and after the G/C-Au-2 catalytic film catalyst 4-NP reduction reaction**

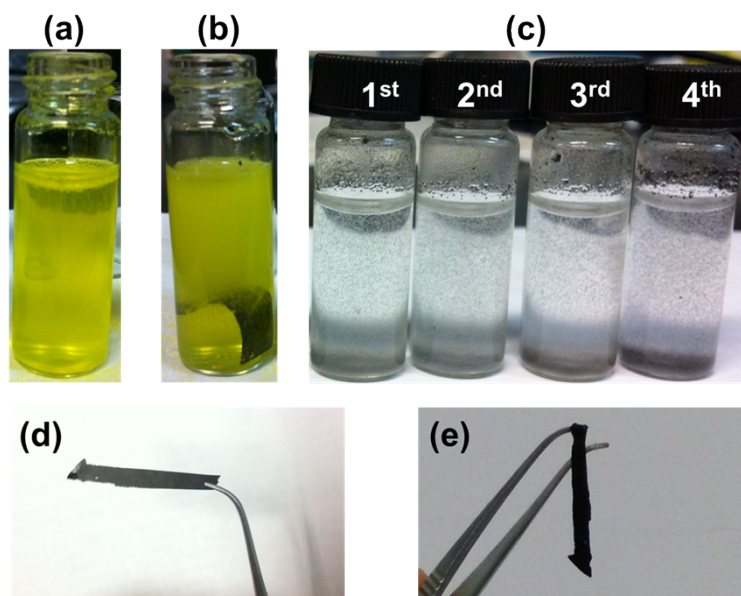

Figure S5. (a) The 4-NP and  $\text{NaBH}_4$  water solution, (b) after addition of the G/C-Au-2 catalytic film, (c) the recycle reaction of the G/C-Au-2 catalytic film, (d) the G/C-Au-2 catalytic film before reaction, (e) the G/C-Au-2 catalytic film before reaction.

## 6. The TEM images of the reused G/C-Au-2 catalyst

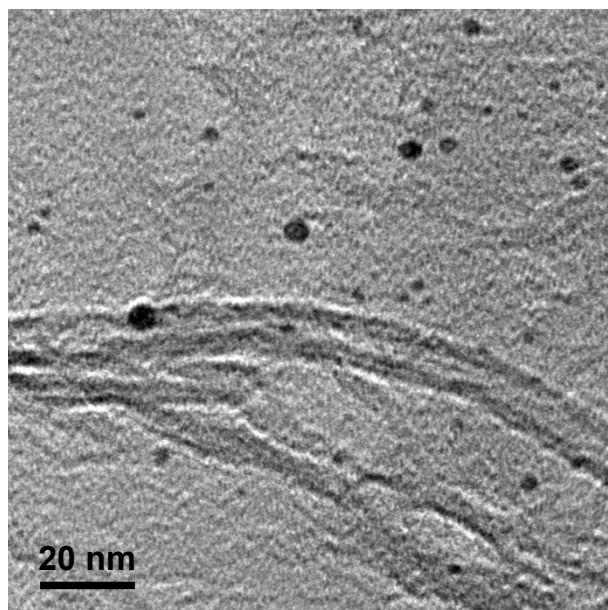

Figure S6. TEM image of G/C-Au-2 catalyst after 10 cycles

Table S1. Au nanoparticle size (nm)<sup>a</sup>, Au loading on support (wt.%)<sup>b</sup>, Apparent reaction rates  $k_{app}$  values, reaction time, TOF values for the Au catalysts for 4-NP reduction.

| Sample                         | G-Au | C-Au | G/C-Au-1 | G/C-Au-2 | G/C-Au-3 |
|--------------------------------|------|------|----------|----------|----------|
| Au size (nm)                   | 4.1  | 4.9  | 2.5      | 2.9      | 1.4      |
| Au loading (wt.%)              | 19.6 | 24.0 | 11.1     | 9.8      | 9.4      |
| $K_{app}$ (min <sup>-1</sup> ) | 0.16 | 0.12 | 0.34     | 0.75     | 0.22     |
| Reaction time (min)            | 15   | 18   | 13       | 4        | 8        |
| TOF values (h <sup>-1</sup> )  | 402  | 274  | 819      | 3015     | 1571     |

<sup>a</sup> Average size obtained from the size distribution histogram.

<sup>b</sup> Calculated by TGA.
